# Supplementary material for: Association of Yogurt and Dietary Supplements Containing Probiotic Consumption With All-Cause and Cause-Specific Mortality in US Adults: A Population-Based Cohort Study
Source: Front Nutr. 2022 Feb 7;9:803076. doi: 10.3389/fnut.2022.803076 (PMC8858963; doi:10.3389/fnut.2022.803076)
Supplement: Supplementary file 1 [file Table_1.XLS]

## Sheet: Sheet1
DSDPID	DSDSUPP
14511	21ST CENTURY HIGH POTENCY ACIDOPHILUS
15977	365 DAILY PROBIOTIC WITH ACIDOPHILUS 4 BILLION CULTURES 4 IMPORTANT PROBIOTIC STRAINS PER TABLET
14341	365 PROBIOTIC COMPLEX WITH ACIDOPHILUS DOUBLE STRENGTH
12216	4X PROBIOTIC UP&UP CONTAINS 4 STRAINS OF NATURAL, BENEFICIAL BACTERIA WITH B. INFANTIS 10 MG
14375	ACCUFLORA ADVANCED CD PROBIOTIC 5 PROBIOTIC STRAINS ADVANCED CD: CONTROLLED DELIVERY
9647	ADVANCED NATURALS FLORAMAX ADVANCED PROBIOTIC FORMULA 12 BILLION CELLS OF 7 STRAINS OF MICROFLORA WITH ACIDOPHILUS, BIFI
17141	ADVOCARE PROBIOTIC RESTORE ULTRA PROBIOTIC
10269	ALIGN PROBIOTIC
15337	ALIGN PROBIOTIC B. INFANTIS 35624 WITH: UNIQUE B. INFANTIS 35624
15338	ALIGN PROBIOTIC CLINICALLY STUDIED B. INFANTIS 35624
4835	ALLERGY RESEARCH GROUP GI FLORA L.ACIDOPHILUS, L.CASEI, L. RHAMNOSUS, B. LONGUM HYPOALLERGENIC
15287	AMERICAN HEALTH CHEWABLE ACIDOPHILUS AND BIFIDUM ONE BILLION ORGANISMS VEGETARIAN FORMULA
2262	AMERICAN HEALTH CHEWABLE ACIDOPHILUS WITH BIFIDUS MILK FREE
10932	AMERICAN HEALTH CHEWABLE MILK FREE ACIDOPHILUS AND BIFIDUM ONE BILLION ORGANISMS VEGETARIAN FORMULA
12332	AMERICAN HEALTH CHEWABLE MILK FREE ACIDOPHILUS AND BIFIDUM ONE BILLION ORGANISMS VEGETARIAN FORMULA
4011	BACID PROBIOTIC CONTAINS A BLEND OF BENEFICIAL BACTERIA INCLUDING LACTOBACILLUS ACIDOPHILUS
17389	BACTICURE NATURAL PROBIOTIC ORGANIC PRODUCT
15641	BARLEAN'S GREENS ORGANIC GREEN FOOD CONCENTRATES GREEN PROTEIN SOURCE PLANT-BASED VITAMINS & MINERALS VEGETARIAN FORMULA HERBAL ANTIOXIDANTS HERBAL TONICS FLAX LIGNANS PROBIOTICS & ENZYMES
13817	BASIC'S NATURAL ACIDOPHILUS BASIC VITAMINS
14136	BIOGAIA PROBIOTICS GERBER SOOTHE COLIC DROPS PROBIOTIC
17516	BIOGAIA PROTECTIS BABY PROBIOTIC DROPS PROBIOTIC
17229	BIOGAIA PROTECTIS DROPS WITH VITAMIN D PROBIOTIC
14010	BIORAY CYTOFLORA PROBIOTIC IMMUNITY TONIC DAILY
10667	BIOSPEC PROBIOTIC PLUS HIGH POTENCY, MULTI-STRAIN PROBIOTIC
15653	BIOTRUST PRO-X10 EQUIVALENT TO 50 BILLION CFU PER DAY! NOW WITH PREFORPRO ADVANCED PROBIOTIC AND GI HEALTH FORMULA
17307	BLUE ROCK HOLISTICS SUPER SHIELD SUPREME MULTI-STRAIN ADULT PROBIOTIC FORMULA
9897	BLUEBONNET MILK-FREE ACIDOPHILUS PLUS FOS L. ACIDOPHILUS, L. BULGARICUS, BIFIDUS
17514	BODY BIOTICS INTERNATIONAL BODY BIOTICS SBO PROBIOTICS CONSORTIA PROBIOTIC & PREBIOTIC 500 MG
17156	BODY DYNAMICS MAXZORB NUTRITION TOTAL DIGESTION PROBIOTIC (MULTISTRAIN WITH) DIGESTIVE ENZYMES 50 BILLION CFU/G
15886	BOTANIC CHOICE ACIDOPHILUS 100 MILLION ORGANISMS
14655	CELL NUTRITIONALS PROBIOTICS AR ACID RESISTENT 16 STRAIN FORMULA COMPREHENSIVE, DAIRY FREE FORMULA PROVIDING 12 BILLION VIABLE CELLS PER CAPSULE AT TIME OF MANUFACTURE
17238	COUNTRY LIFE CORE DAILY-1 MULTIVITAMINS 1 DAILY WOMEN 50+ ONE TABLET INCLUDES: 200+ MG OF WOMEN'S HEALTH BLEND OVER 30 RAW WHOLE FOODS 'COENZYMATED' B VITAMINS AND PROBIOTICS, DIGESTIVE ENZYMES
13686	COUNTRY LIFE DAIRY-FREE ACIDOPHILUS WITH PECTIN
15684	COUNTRY LIFE DAIRY-FREE PROBIOTIC POWER-DOPHILUS MULTI-STRAIN FORMULA 12 BILLION CFUS PER SERVING (AT THE TIME OF MANUFACTURE)
16638	CULTURELLE DIGESTIVE HEALTH DAILY PROBIOTIC FORMULA NOW 100% VEGETARIAN ONCE DAILY VEGETARIAN CAPSULES
12560	CULTURELLE DIGESTIVE HEALTH PROBIOTIC PROBIOTIC WITH NATURALLY SOURCED DAIRY-FREE LACTOBACILLUS GG ONCE DAILY CAPSULES 10 BILLION ACTIVE CULTURES
16636	CULTURELLE KIDS CHEWABLES DAILY PROBIOTIC FORMULA 5 BILLION ACTIVE CULTURES! PROBIOTIC WITH NATURALLY SOURCED LACTOBACILLUS GG
16637	CULTURELLE KIDS PACKETS DAILY PROBIOTIC FORMULA 5 BILLION ACTIVE CULTURES! PROBIOTIC WITH NATURALLY SOURCED LACTOBACILLUS GG
12940	CULTURELLE KIDS! PACKETS PROBIOTIC PROBIOTIC WITH NATURALLY SOURCED LACTOBACILLUS GG
10713	CULTURELLE PROBIOTIC NATURAL HEALTH & WELLNESS ONCE DAILY CAPSULES ALL NATURAL PROBIOTIC WITH LACTOBACILLUS GG
17164	CULTURELLE PROBIOTICS DIGESTIVE HEALTH DAILY PROBIOTIC WITH 100% LACTOBACILLUS GG 10 BILLION ACTIVE CULTURES CHEWABLES ONCE DAILY TABLETS
17162	CUSTOM PROBIOTICS HIGH COUNT, MULTI-STRAIN ACIDOPHILUS AND BIFIDUS 60 BILLION CFU'S/CAPSULE ADULT FORMULA CP-1 DAIRY FREE
16734	CVS HEALTH PROBIOTIC FORMULA ACIDOPHILUS 1 BILLION ACTIVE CULTURES
17379	CVS HEALTH SENIOR PROBIOTIC CONTAINS PREBIOTIC FIBERS AND THE HEALTHY BACTERIA FORMULATED WITH MORE BIFIDOBACTERIUM FOR ADULTS 50+ 10 STRAINS 15 BILLION LIVE BACTERIA CELLS PER CAPSULE ONE-A-DAY
7965	CVS PHARMACY EXTRA STRENGTH ACIDOPHILUS
12885	CVS/PHARMACY ADULT PROBIOTIC 3 BILLION LIVE BACTERIA CELLS PER CAPSULE WITH 8 NATURAL PROBIOTIC STRAINS, INCLUDING 2 BIFIDOBACTERIA STRAINS ONE-A-DAY
14715	DAVINCI LABORATORIES OF VERMONT NONDAIRY PROBIOTIC 50 VEGETARIAN / GLUTEN FREE
7263	DDS-100 ACIDOPHILUS WITH FOS CHEWABLE TABLETS (2 BILLION CFU/G) UAS LABORATORIES
17302	DEFAULT CHILDREN'S PROBIOTIC
14902	DEFAULT CHILDREN'S PROBIOTIC PACKET
17501	DEFAULT CHILDREN'S PROBIOTIC POWDER
15174	DEFAULT GUMMY ADULT PROBIOTIC
13069	DEFAULT GUMMY BEAR PROBIOTIC
3460	DEFAULT LACTOBACILLUS ACIDOPHILUS
17714	DEFAULT LACTOBACILLUS ACIDOPHILUS
5597	DEFAULT PROBIOTIC
14118	DESIGNS FOR HEALTH PROBIOTIC SYNERGY POWDER 20 BILLION ORGANISMS PER SERVING
15173	DIGESTIVE ADVANTAGE KIDS DAILY PROBIOTIC GUMMIES
11313	DIGESTIVE ADVANTAGE LACTOSE DEFENSE FORMULA DUAL-ACTION! ENZYME PLUS PROBIOTICS TAKE EVERY DAY
7588	DIGESTIVE ENZYMES & PROBIOTICS WITH ENZYGUARD-D 4LIFE
14717	DIGESTZEN PB ASSIST+ PROBIOTIC DEFENSE FORMULA DOTERRA
16001	DR. MERCOLA COMPLETE PROBIOTICS 70 BILLION CFU ACID AND BILE RESISTANT 10 STRAINS
16478	DR. SINATRA HEART HEALTHY PROBIOTIC SOLUTIONS
16352	DR. WHITAKER PEARLBIOTIC SPHERES DELIVERS 2 BILLION LIVE PROBIOTICS IN 7 STRAINS
5343	ENZYMATIC THERAPY NATURAL MEDICINES ACIDOPHILUS PEARLS WITH L. ACIDOPHILUS AND B. LONGUM
12176	ENZYMATIC THERAPY PROBIOTIC PEARLS HIGH POTENCY ADVANCED 3-LAYER SOFTGEL ONCE DAILY LACTOBACILLI & BIFIDOBACTERIA
17183	EQUATE PROBIOTIC GUMMIES DIETARY PROBIOTIC
14032	FINEST NUTRITION ACIDOPHILUS L. ACIDOPHILUS 1 BILLION CFUS (LIVE ORGANISMS) PER TABLET ONE PER DAY
16890	FINEST NUTRITION DIGESTIVE PROBIOTIC MAXIMUM CARE 30 BILLION ACTIVE CULTURES PER CAPSULE ONE PER DAY
16891	FINEST NUTRITION PROBIOTIC 10 BILLION CFU PER SERVING ONE PER DAY
16629	FLORA UDO'S CHOICE INFANT'S PROBIOTIC 6 INFANT & TODDLER-SPECIFIC STRAINS 3 BILLION CELLS AT TIME OF MANUFACTURE
15729	FLORA UDO'S CHOICE SUPER 5 LOZENGE PROBIOTIC 2 BILLION CELLS AT TIME OF MANUFACTURE
14582	FLORABABY ADVANCED PROBIOTIC FORMULA FOR INFANTS & TODDLERS 5 STRAINS OF BENEFICIAL PROBIOTICS 4 BILLION LIVE CULTURES PER SERVING PROBIOTIC RENEW LIFE
9873	FLORAJEN3 HIGH POTENCY PROBIOTIC ACIDOPHILUS BIFIDUM LONGUM 15 BILLION LIVE CULTURES PER CAPSULE
17338	FLORASTOR DAILY PROBIOTIC UNIQUE STRAIN WITH LARGER, STRONGER CELLS THAN OTHER PROBIOTICS SACCHAROMYCES BOULARDII LYO CNCM I-745 250 MG
17337	FLORASTORKIDS DAILY PROBIOTIC UNIQUE STRAIN WITH LARGER, STRONGER CELLS THAN OTHER PROBIOTICS SACCHAROMYCES BOULARDII LYO CNCM I-745 SACHETS | 250 MG | POWDER
11033	FRIENDLY FLORA PREBIOTIC AND PROBIOTIC COMPLEX FOS AND LACTOBACILLUS 5 BILLION CFU PROCAPS LABORATORIES
15302	FUSION PLUS IRON / FOLIC ACID / VITAMIN / PROBIOTIC CAPSULES
12958	FUTUREBIOTICS COLON GREEN GENTLE, ALL-NATURAL FIBER WITH PROBIOTICS AND ENZYMES NOW WITH SUPER-STABLE PROBIOTICS
16378	FUTUREBIOTICS LONGEST LIVING ACIDOPHILUS+ OVER 1.5 BILLION DAIRY-FREE ORGANISMS PER CAPSULE NOW 100% VEGETARIAN
16375	GARDEN OF LIFE DR. FORMULATED PROBIOTICS MOOD+ 50 BILLION GUARANTEED 16 PROBIOTIC STRAINS MADE WITH ORGANIC ASHWAGANDHA, BLUEBERRIES & ACACIA FIBER RAW PROBIOTIC
16918	GARDEN OF LIFE DR. FORMULATED PROBIOTICS ONCE DAILY MEN'S 50 BILLION GUARANTEED 15 PROBIOTIC STRAINS RAW PROBIOTIC
16376	GARDEN OF LIFE DR. FORMULATED PROBIOTICS ONCE DAILY ULTRA 90 BILLION GUARANTEED 15 PROBIOTIC STRAINS RAW PROBIOTIC
16919	GARDEN OF LIFE DR. FORMULATED PROBIOTICS ORGANIC KIDS+ PROBIOTICS + VITAMINS C & D 5 BILLION GUARANTEED 14 PROBIOTIC STRAINS USDA ORGANIC NO SUGAR ADDED PROBIOTIC
16920	GARDEN OF LIFE DR. FORMULATED PROBIOTICS URINARY TRACT+ 50 BILLION GUARANTEED 16 PROBIOTIC STRAINS MADE WITH ORGANIC CRANBERRY & ACACIA FIBER RAW PROBIOTIC
6999	GARDEN OF LIFE PRIMAL DEFENSE HSO PROBIOTIC FORMULA
15753	GARDEN OF LIFE PRIMAL DEFENSE HSO PROBIOTIC FORMULA VEGETARIAN WHOLE FOOD
10392	GARDEN OF LIFE PRIMAL DEFENSE ULTRA ULTIMATE PROBIOTIC FORMULA 15 BILLION CELLS DAILY 13 BENEFICIAL CULTURES WITH HSOS W
14108	GARDEN OF LIFE RAW BEYOND VITAMINS & MINERALS VITAMIN CODE 50 & WISER MEN RAW WHOLE FOOD MULTI LIVE PROBIOTICS & ENZYMES RAW FOOD-CREATED NUTRIENTS WITH CODE FACTORS RAW FOOD
16377	GARDEN OF LIFE RAW PROBIOTICS KIDS USDA ORGANIC RAW VEGETARIAN RAW WHOLE FOOD
14953	GARDEN OF LIFE RAW PROBIOTICS ULTIMATE CARE 100 BILLION GUARANTEED! 34 PROBIOTIC STRAINS ONCE DAILY INCLUDES THE CLINICALLY STUDIED REPLENISH BLEND RAW WHOLE FOOD PROBIOTIC
12417	GARDEN OF LIFE RAW PROBIOTICS WOMEN 50 & WISER 85 BILLION LIVE CULTURES 33 PROBIOTIC STRAINS PROBIOTIC-CREATED VITAMINS, MINERALS, ENZYMES & PREBIOTICS CONTAINS TARGETED PROBIOTICS RAW WHOLE FOOD
17270	GARDEN OF LIFE RAW PROBIOTICS WOMEN 85 BILLION LIVE CULTURES 32 PROBIOTIC STRAINS PROBIOTIC-CREATED VITAMINS, MINERALS, ENZYMES & PREBIOTICS CONTAINS TARGETED PROBIOTICS RAW WHOLE FOOD
11270	GARDEN OF LIFE RAW VITAMIN CODE 50 & WISER WOMEN RAW WHOLE FOOD MULTI LIVE PROBIOTICS & ENZYMES RAW FOOD-CREATED NUTRIEN
17477	GENERIC PROBIOTIC COLON SUPPORT
12961	GENERIC36 ACIDOPHILUS PROBIOTIC BLEND
17182	GENERIC48 ALL NATURAL ACIDOPHILUS HIGH POTENCY
13925	GENERIC7 PROBIOTIC ACIDOPHILUS
7158	GENERIC8 ACIDOPHILUS & PROBIOTIC COMPLEX
17411	GENESIS PURE PROBIOTIC
16301	GENESTRA BRANDS HMF NEURO POWDER PROBIOTIC
7048	GNC NATURAL BRAND ACIDOPHILUS 2 BILLION CFU
7032	GNC NATURAL BRAND ACIDOPHILUS 4 BILLION CFU
5667	GNC NATURAL BRAND MEGA ACIDOPHILUS
4481	GNC NATURAL BRAND POTENT ACIDOPHILUS
2887	GNC NATURAL BRAND ULTRA ACIDOPHILUS 350 MG
17412	GNC PREVENTIVE NUTRITION CLEANSING FORMULA A UNIQUE COMBINATION OF HERBS, ENZYMES AND ACIDOPHILUS 750 MG OF PSYLLIUM
13709	GNC PROBIOTIC COMPLEX CHEWABLE TABLET 1.5 BILLION CFUS
13971	GNC PROBIOTICS PROBIOTIC COMPLEX 4 4 BILLION CFUS
13702	GNC PROBIOTICS ULTRA 25 BILLION CFUS PROBIOTIC COMPLEX
13926	GNC ULTRA 50 BILLION CFUS PROBIOTIC COMPLEX GUARANTEED POTENCY 50
11698	GNC WOMEN'S ULTRA MEGA WITH PROBIOTICS MULTIVITAMIN DELIVERS 1 BILLION LIVE, ACTIVE CULTURES WITH 1,600 IU OF VITAMIN D-3
3979	HEALTH PLUS INC. SUPER COLON CLEANSE WITH HERBS & ACIDOPHILUS
14842	HEALTHWAY MEDICAL, P.C. PRO-C 750 MG VITAMIN C WITH PROBIOTICS VEGETARIAN
12947	HEALTHY DELIGHTS PROBIOTIC BITES DARK CHOCOLATE ONE BILLION CULTURES PER BITE IDEAL FOR ADULTS & CHILDREN FAMILY FORMULA
14625	HEALTHY ORIGINS NATURAL PROBIOTIC 30 BILLION CFU'S 8 STRAINS AND 30 BILLION COLONY FORMING UNITS FLORAFIT
3147	HERBALIFE FLORAFIBER LACTOBACILLUS ACIDOPHILUS AND FIBER
17180	HYPERBIOTICS PRO-15 THE PERFECT PROBIOTIC 5 BILLION CFU 15 STRAINS 15X MORE EFFECTIVE THAN CAPSULES! PATENTED, TIME-RELEASE MICRO-PEARLS VEGETARIAN NATURAL PROBIOTIC
16640	HYPERBIOTICS PRO-KIDS THE PERFECT CHILDREN'S PROBIOTIC 3 BILLION CFU ONE VERY TINY PEARL PATENTED, TIME-RELEASE, MICRO-PEARLS 100% VEGETARIAN
17112	INNATE RESPONSE FORMULAS FLORA 20-14 ULTRA STRENGTH 14 NON-COMPETING STRAINS 20 BILLION ACTIVE PROBIOTIC CELLS
16222	ISOTONIX DIGESTIVE ENZYMES WITH PROBIOTICS
17345	IVL INSTITUTE FOR VIBRANT LIVING GO RUBY GO! THE ULTIMATE SUPER FOOD FRUIT DRINK CONTAINS PROBIOTICS
12952	JARROW FORMULAS BABY JARRO-DOPHILUS +FOS WITH CLINICALLY DOCUMENTED STRAINS 3 BILLION PROBIOTIC
7281	JARROW FORMULAS ENHANCED PROBIOTIC SYSTEM JARRO-DOPHILUS EPS ENTERIC COATED
14403	JARROW FORMULAS JARRO-DOPHILUS + FOS 6 BENEFICIAL PROBIOTIC STRAINS WITH CLINICALLY DOCUMENTED STRAINS 3.4 BILLION PER CAPSULE PROBIOTIC
15892	JARROW FORMULAS JARRO-DOPHILUS EPS ENHANCED PROBIOTIC SYSTEM WITH CLINICALLY DOCUMENTED STRAINS ROOM TEMPERATURE STABLE 5 BILLION PER CAPSULE 8 STRAINS ENTEROGUARD PROBIOTIC
13990	JARROW FORMULAS JARRO-DOPHILUS ORIGINAL WITH CLINICALLY DOCUMENTED STRAINS 6 BENEFICIAL PROBIOTIC STRAINS 3.4 BILLION PER CAPSULE PROBIOTIC
9260	JUICE FOR LIFE POWER FRUIT FORMULA WHOLE FOOD CONCENTRATES WITH ENZYMES, PROBIOTICS & ANTIOXIDANTS
9259	JUICE FOR LIFE POWER VEGGIE FORMULA WHOLE FOOD CONCENTRATES WITH ENZYMES, PROBIOTICS & ANTIOXIDANTS
12407	JUICEFESTIV FRUITFESTIV 23 FRUITS, ANTIOXIDANTS, PROBIOTICS & DIGESTIVE ENZYMES FEATURES: ACAI, POMEGRANATE, BLUEBERRY AND NONI NATROL
12694	KID'S KYO-DOPHILUS PROBIOTIC ONE PER DAY
16307	KLAIRE LABS LACTOPRIME PLUS SCD COMPLIANT 25+ BILLION CFUS MULTI-SPECIES PROBIOTIC
12825	KLAIRE LABS SACCHAROMYCES BOULARDII 3+ BILLION CFUS PROBIOTIC
14581	KLAIRE LABS THER-BIOTIC INFANT FORMULA 10+ BILLION CFUS MULTI-SPECIES PROBIOTIC
16055	KROGER PROBIOTIC COLON SUPPORT WITH BIO-RELEASE 4 STRAINS OF GOOD BACTERIA ONCE DAILY
15273	KYO-DOPHILUS PROBIOTIC
14249	KYO-DOPHILUS PROBIOTICS PLUS CRANBERRY EXTRACT
9149	L.A. FARMACIA NATURAL MICROENCAPSULATED ACIDOPHILUS
16698	LEAF ORIGIN ESSENTIAL CULTURES DAILY PROBIOTIC 30 BILLION CFU 15 UNIQUE STRAINS
15950	LEE SWANSON SIGNATURE LINE ULTIMATE PROBIOTIC FORMULA OVER 66 BILLION ORGANISMS PER CAPSULE
7889	LIFETIME LIQUID ACIDOPHILUS SOY BASE MILK FREE
11576	L'IL CRITTERS PROBIOTIC ACIDOPHILUS DAILY
14440	MASON NATURAL CHEWABLE SOLUBLE FIBER WITH PROBIOTICS ADULTS & KIDS
7001	MEGAFLORA OPTIMAL POTENCY PROBIOTIC FORMULA 100% WHOLE FOOD MEGAFOOD
16676	MEGAFOOD KIDS N' US MEGAFLORA 5 BILLION CFU PROBIOTIC
16127	MEMBER'S MARK 5X PROBIOTIC FORMULATED WITH 5 STRAINS OF HEALTHY BACTERIA INCLUDING B. INFANTIS
16172	MEMBER'S MARK ULTIMATE PROBIOTIC FORMULA ACIDOPHILUS MADE WITH BIOFLORA 2 BILLION ACTIVE CULTURES 1 CAPLET PER DAY
15131	METABIOTIC PROBIOTIC WITH BIO-ACTIVE 12 PROBIOTIC
16434	METAGENICS ULTRAFLORA CHILDREN'S DAILY PROBIOTIC CHEWABLE TABLETS
13936	METAGENICS ULTRAFLORA IMMUNE HEALTH PROBIOTIC
13178	METAGENICS ULTRAFLORA SYNERGY (FORMERLY ULTRA FLORA PLUS DF) ENHANCED WITH PREBIOTICS POWDER PROBIOTIC
15690	MULTI-PROBIOTIC 4000 DOUGLAS LABORATORIES
7043	NATROL ACIDOPHILUS PROBIOTIC
15413	NATROL JUICEFESTIV DAILY FRUIT 23 FRUITS +ANTIOXIDANTS, PROBIOTICS & DIGESTIVE ENZYMES MADE WITH ORGANIC FRUITS
9239	NATURAL FACTORS MULTI ACIDOPHILUS WITH FOS CAPSULES 4 BILLION ACTIVE CELLS
12811	NATURE CITY TRUELIFE PB PROBIOTIC AND PREBIOTIC BLEND PROFESSIONAL STRENGTH! 30 BILLION LIVE 'GOOD BACTERIA' CELLS PER DOSE PROVIDES 6 HEALTH BOOSTING PROBIOTIC STRAINS
5900	NATURE MADE ACIDOPHILUS 500 MILLION LIVE CELLS PER TABLET
14829	NATURE MADE ACIDOPHILUS PROBIOTICS 1 BILLION LIVE CELLS PER SERVING
14410	NATURE MADE DIGESTIVE HEALTH PROBIOTIC 10 BILLION LIVE CELLS ONCE DAILY
14095	NATURE MADE TRIPLE PROBIOTIC
8386	NATURE'S BLEND HIGH POTENCY CHEWABLE ACIDOPHILUS
15903	NATURE'S BLEND HIGH POTENCY CHEWABLE ACIDOPHILUS
14127	NATURE'S BLEND PROBIOTIC BLEND
3340	NATURE'S BOUNTY ACIDOPHILUS
15908	NATURE'S BOUNTY ACIDOPHILUS PROBIOTIC 100 MILLION ORGANISMS
13108	NATURE'S BOUNTY ACIDOPHILUS PROBIOTIC 100 MILLION ORGANISMS LACTOBACILLUS ACIDOPHILUS 1 PER DAY TABLET
12148	NATURE'S BOUNTY CHEWABLE PROBIOTIC ACIDOPHILUS 1 BILLION ORGANISMS WITH BIFIDUM CHEWABLE MILK FREE WAFER
15323	NATURE'S BOUNTY CHEWABLE PROBIOTIC ACIDOPHILUS 1 BILLION ORGANISMS WITH LACTIS CHEWABLE MILK FREE WAFER
4637	NATURE'S BOUNTY PROBIOTIC ACIDOPHILUS
14192	NATURE'S BOUNTY PROBIOTIC ACIDOPHILUS 100 MILLION ORGANISMS LACTOBACILLUS ACIDOPHILUS 1 PER DAY CAPSULE
9214	NATURE'S BOUNTY PROBIOTIC ACIDOPHILUS CAPSULES
16069	NATURE'S BOUNTY PROBIOTIC GUMMIES 4 BILLION LIVE CULTURES PER SERVING CONTAINS PROBIOTIC STRAIN BACILLUS COAGULANS UNIQUE IS-2
13772	NATURE'S BOUNTY ULTRA STRENGTH ADVANCED PROBIOTIC 10 10 PROBIOTIC ORGANISMS WITH ACTIVE CULTURE SUPPORT 20 BILLION LIVE PROBIOTIC CULTURES
15913	NATURE'S BOUNTY ULTRA STRENGTH PROBIOTIC 10 20 BILLION LIVE PROBIOTIC CULTURES 10 PROBIOTIC STRAINS
5967	NATURE'S LIFE LACTOBACILLUS ACIDOPHILUS APPLE PECTIN LIVE, ACTIVE ORGANISMS PROBIOTIC CAPSULES
10529	NATURE'S PLUS ADULT'S EAR, NOSE & THROAT LOZENGES WITH K12 PROBIOTICS
17222	NATURE'S PLUS SOURCE OF LIFE ANIMAL PARADE ACIDOPHIKIDZ WITH PROBIOTICS, FOS & GRAPE SEED CHILDREN'S CHEWABLE WITH WHOLE FOOD CONCENTRATES
10612	NATURE'S PLUS SOURCE OF LIFE ANIMAL PARADE ACIDOPHIKIDZ WITH PROBIOTICS, FOS & RHODODENDRON CHILDREN'S CHEWABLE WITH WHO
3307	NATURE'S SUNSHINE BIFIDOPHILUS FLORA FORCE BIFIDOBACTERIUM LONGUM & LACTOBACILLUS ACIDOPHILUS 470 MG
12703	NATURE'S SUNSHINE BIFIDOPHILUS FLORA FORCE PROBIOTIC 4 BILLION TOTAL MICROORGANISMS PER CAPSULE
14725	NATURE'S SUNSHINE L. ACIDOPHILUS MODIFIED RELEASE PROBIOTIC FORMULA
10882	NATURE'S SUNSHINE PROBIOTIC ELEVEN
13038	NATURE'S SUNSHINE PROBIOTIC ELEVEN CONTAINS ELEVEN BENEFICIAL ORGANISMS IN A PREBIOTIC BLEND
16614	NATURE'S WAY PRIMADOPHILUS FORTIFY DAILY PROBIOTIC 30 BILLION LIVE PROBIOTIC CULTURES PER CAPSULE DELAYED RELEASE PROBIOTIC
12536	NATURE'S WAY PRIMADOPHILUS ORIGINAL ONCE DAILY TRUE POTENCY 5 BILLION CFU TRUE IDENTITY ACIDOPHILUS & RHAMNOSUS TRUE RELEASE TARGETED DELIVERY ENTERIC-COATED FOR ALL AGES
12124	NATURE'S WAY PRIMADOPHILUS REUTERI SUPERIOR PROBIOTIC MULTI STRAIN PLUS SCFOS TRUE POTENCY 5 BILLION CFU ENTERIC-COATED ONCE DAILY
5692	NEW CHAPTER EVERY MAN II WHOLE-FOOD PROBIOTIC MULTI-NUTRIENT, MINERAL & HERBAL COMPLEX
6919	NEW CHAPTER EVERY WOMAN WHOLE-FOOD PROBIOTIC MULTI-VITAMIN, MINERAL & HERBAL COMPLEX
6920	NEW CHAPTER EVERY WOMAN'S ONE DAILY WHOLE-FOOD PROBIOTIC MULTI-VITAMIN, MINERAL & HERBAL COMPLEX
11725	NEW CHAPTER ORGANICS PROBIOTIC ALL-FLORA WHOLE FOOD LIVE PROBIOTICS
9104	NEW CHAPTER ORGANICS PROBIOTIC NUTRIENTS CAL MAG BONE HEALTH CALCIUM AND SYNERGISTIC NUTRIENTS IN THEIR MOST ACTIVE FORM
6922	NEW CHAPTER ORGANICS PROBIOTIC NUTRIENTS EVERY MAN
8974	NEW CHAPTER ORGANICS PROBIOTIC NUTRIENTS EVERY MAN II FOR MEN OVER 40 MADE WITH ORGANIC INGREDIENTS
7275	NEW CHAPTER ORGANICS PROBIOTIC NUTRIENTS PERFECT PRENATAL
6921	NEW CHAPTER VITAMIN B COMPLEX WHOLE-FOOD HERBAL PROBIOTIC NUTRIENT COMPLEX
15439	NEW VITALITY RUBY REDS NEW & IMPROVED FORMULA POMEGRANATE, ACAI & MAQUI A DELICIOUS FRUIT AND VEGETABLE WITH POTENT VITAMINS, MINERALS, ENZYMES, HERBS, NUTRIENTS AND PROBIOTICS
8848	NOW BERRY DOPHILUS 4 PROBIOTIC STRAINS 2.5 BILLION INPUT NATURAL BERRY FLAVOR XYLITOL SWEETENED CHEWABLES
17385	NOW PROBIOTIC-10 25 BILLION 10 PROBIOTIC STRAINS CLINICALLY VALIDATED STRAINS VEGETARIAN/VEGAN
8784	NSI NUTRACEUTICAL SCIENCES INSTITUTE PROBIOTIC 15-35 15 STRAINS / 35 BILLION MICROORGANISMS PER SERVING
16978	NUCIFIC BIO-X4 4-IN-1 WEIGHT MANAGEMENT PROBIOTIC
17294	NUCIFIC PROBIOTIC COMPLEX DAILY PROBIOTIC
7640	NUTRICOLOGY PROGREENS WITH ADVANCED PROBIOTIC FORMULA
9187	NUTRI-HEALTH FLORA SOURCE MULTI-PROBIOTIC BLEND OF 16 STRAINS / 16 BILLION CELLS CAPSULES
16275	NUTRILITE DIGESTIVE PROBIOTIC STICK PACKS 1 STICK PACK, 1X A DAY
17398	NUTRILITE KIDS SEASONAL STRENGTH PROBIOTIC
10204	NUTRITION NOW PB8 PRO-BIOTIC ACIDOPHILUS FOR LIFE
12875	NUTRITION NOW PB8 PRO-BIOTIC ACIDOPHILUS FOR LIFE ORIGINAL FORMULA 14 BILLION GOOD BACTERIA
8817	NUTRITION NOW PROBIOTIC ACIDOPHILUS
8566	NUTRITION NOW RHINO CHEWABLE FOS & ACIDOPHILUS CHEWABLE TABLETS 100% DAILY VALUE OF VITAMIN C
16541	OLLY KIDS HAPPY TUMMY PROBIOTIC, PREBIOTIC & PEPPERMINT
16608	OLLY KIDS' MULTI + PROBIOTIC A BLEND OF VITAMINS A, C, D, E, BS & ZINC
6814	OPTIMUM FREEZE DRIED ACIDOPHILUS LACTOBACILLI
10898	ORIGIN ACIDOPHILUS EASY TO SWALLOW
5820	PB8 PRO-BIOTIC ACIDOPHILUS FOR LIFE
11510	PHILLIPS' COLON HEALTH PROBIOTIC CAPS BAYER
15562	PHILLIPS' COLON HEALTH PROBIOTIC CAPS DAILY PROBIOTIC ONE DAILY BAYER
12545	PREMIER RESEARCH LABS GALLBLADDER-ND PROBIOTIC-DERIVED FORMULA FEATURING ND TECHNOLOGY
16146	PROBIOTIC 14 UNIQUE STRAINS 500 MG
17314	PROBIOTIC AMERICA PERFECT BIOTICS 30 BILLION CFUS 15 STRAINS ROOM TEMP STABLE DAILY PROBIOTIC
7337	PROBIOTIC PEARLS WITH L. ACIDOPHILUS AND B. LONGUM
5494	PROBIOTICA LACTOBACILLUS REUTERI CHEWABLE TABLETS
3243	PRO-BIOTICS ACIDOPHILUS
397	PURITAN'S PRIDE ACIDOPHILUS
17090	PURITAN'S PRIDE ACIDOPHILUS COMPLEX CONTAINS: L. ACIDOPHILUS, B. BIFIDUM 1 BILLION ACTIVE CULTURES
398	PURITAN'S PRIDE POTENT ACIDOPHILUS WITH PECTIN
15921	PURITAN'S PRIDE PREMIUM PROBIOTIC 10 20 BILLION LIVE PROBIOTIC CULTURES WITH CLINICALLY STUDIED STRAINS
17091	PURITAN'S PRIDE PREMIUM PROBIOTIC ACIDOPHILUS 100 MILLION ACTIVE CULTURES
15875	PURITAN'S PRIDE PROBIOTIC 10 FROM 10 DIFFERENT PROBIOTIC ORGANISMS 20 BILLION ACTIVE CULTURES PER SERVING
17092	PURITAN'S PRIDE PROBIOTIC ACIDOPHILUS STOMACH FRIENDLY 100 MILLION ACTIVE CULTURES VEGETARIAN
12528	PURITAN'S PRIDE VITA-FRESH LIFE'S GREENS WITH ADVANCED PROBIOTIC FORMULA 29,205 TOTAL ORAC VALUE VEGETARIAN
10841	RAINBOW LIGHT 50+ MINI-TAB AGE-DEFENSE FORMULA FOOD-BASED MULTIVITAMIN WITH COQ10 1,000 IU VITAMIN D3 PROBIOTICS & DIGES
10265	RAINBOW LIGHT ACTIVE HEALTH TEEN FOOD-BASED MULTIVITAMIN TARGETED TEEN NUTRITION 75 MILLION LIVE ACTIVE PROBIOTICS
11804	RAINBOW LIGHT ACTIVE SENIOR JUST 1 ONCE FOOD-BASED MULTIVITAMIN B-COMPLEX 1,000 IU VITAMIN D3 & PROBIOTICS
9651	RAINBOW LIGHT JUST 1 ONCE NATURALS WOMEN'S ONE MULTIVITAMIN/MINERAL NOW WITH PROBIOTICS
10839	RAINBOW LIGHT MEN'S ONE JUST 1 ONCE FOOD-BASED MULTIVITAMIN ENERGY B-COMPLEX & PROBIOTICS
12596	RAINBOW LIGHT MEN'S ONE JUST 1 ONCE FOOD-BASED MULTIVITAMIN ENERGY B-COMPLEX & PROBIOTICS
16284	RAINBOW LIGHT PRENATAL ONE FOOD-BASED MULTIVITAMIN EASY TO DIGEST WITH PROBIOTICS & ENZYMES
16462	RAINBOW LIGHT WOMEN'S ONE FOOD-BASED MULTIVITAMIN EASY TO DIGEST WITH PROBIOTICS & ENZYMES
12933	RAINBOW LIGHT WOMEN'S ONE JUST 1 ONCE FOOD-BASED MULTIVITAMIN 800 IU VITAMIN D3 & PROBIOTICS
5056	RBC DIGESTION FORMULA WITH ENZYMES, PROBIOTICS AND NANOCLUSTERS
16859	RENEW LIFE EVERYDAY ULTIMATE FLORA PROBIOTIC 15 BILLION LIVE CULTURES PER CAPSULE 10 PROBIOTIC STRAINS PROBIOTIC
16857	RENEW LIFE ULTIMATE FLORA PROBIOTIC FIZZY DRINK MIX 15 BILLION LIVE CULTURES PER SERVING PROBIOTIC
16856	RENEW LIFE ULTIMATE FLORA PROBIOTIC GUMMIES 2 BILLION LIVE CULTURES PER SERVING FOR KIDS AGES 2-102 PROBIOTIC
11571	REPHRESH PRO-B PROBIOTIC FEMININE
10154	REXALL NATURALS GESTAZYME MULTI-ENZYME PROBIOTIC FORMULA ACIDOPHILUS PROBIOTIC FORMULA 1 BILLION ACTIVE CULTURES PER SER
8739	REXALL NATURALS ULTIMATE PROBIOTIC FORMULA ACIDOPHILUS MADE WITH BIO FLORA 2 BILLION ACTIVE CULTURES
17099	REXALL PROBIOTIC ACIDOPHILUS 100 MILLION ACTIVE CULTURES
14421	RITE AID PHARMACY NATURAL ACIDOPHILUS PROBIOTIC COMPLEX MILK FREE 300 MG
11384	RITE AID PHARMACY PROBIOTIC COLON CARE LACTOBACILLUS ACIDOPHILUS, BIFIDOBACTERIUM LONGUM, B. BIFIDUM PROBIOTIC ONE DAILY
16299	SCHIFF DIGESTIVE ADVANTAGE DAILY PROBIOTIC POWERED BY GANEDEN BC30 PROBIOTIC
14584	SCHIFF DIGESTIVE ADVANTAGE PROBIOTIC GUMMIES
17680	SCHIFF DIGESTIVE ADVANTAGE PROBIOTIC GUMMIES POWERED BY GANEDEN BC30 PROBIOTIC
12205	SCHIFF SUSTENEX PROBIOTIC GUMMIES
16303	SEEKING HEALTH PROBIOTA SENSITIVE SCD AND GAPS COMPLIANT PROBIOTIC PHYSICIAN FORMULATED
3407	SHAKLEE BIFIDUS & ACIDOPHILUS OPTIFLORA PROBIOTIC COMPLEX
9199	SOLARAY MULTIDOPHILUS 12 OVER 20 BILLION MICROORGANISMS 12 PROBIOTIC STRAINS
1838	SOLGAR ADVANCED 40+ ACIDOPHILUS NON-DAIRY LACTOSE FREE
11516	SOLGAR ADVANCED ACIDOPHILUS PLUS 500 MILLION MICROORGANISMS PER USE
10909	SPRING VALLEY 1 PER DAY DOSE ALL NATURAL CRANBERRY WITH VITAMIN C & PROBIOTICS NEW IMPROVED FORMULA
3345	SPRING VALLEY ACIDOPHILUS
7817	SPRING VALLEY ACIDOPHILUS
16850	SPRING VALLEY DAILY PROBIOTIC 4 BILLION ACTIVE CULTURES PER CAPSULE FORMULATED FOR DAILY USE CONTAINS PREBIOTIC FIBERS AND 10 STRAINS OF BENEFICIAL BACTERIA
11408	SPRING VALLEY PROBIOTIC ACIDOPHILUS 1 BILLION ACTIVE CULTURES
15533	SPRING VALLEY PROBIOTIC ACIDOPHILUS 1 BILLION ACTIVE CULTURES PER CAPLET
14667	SPRING VALLEY PROBIOTIC ACIDOPHILUS 2 BILLION ACTIVE CULTURES
11608	SPRING VALLEY PROBIOTIC MULTI-ENZYME DIGESTIVE FORMULA 1 BILLION ACTIVE CULTURES PER SERVING
15534	SPRING VALLEY PROBIOTIC MULTI-ENZYME DIGESTIVE FORMULA WITH ACTIVE ACIDOPHILUS CULTURES
10763	SPRING VALLEY SUPER STRENGTH PROBIOTIC ACIDOPHILUS 2 BILLION ACTIVE CULTURES
3362	SUNDOWN ACIDOPHILUS XTRA
12638	SUNDOWN NATURALS CHEWABLE ACIDOPHILUS WITH BIFIDUM 1 BILLION ACTIVE CULTURES PER WAFER VEGETARIAN FORMULA
10671	SUNDOWN NATURALS PROBIOTIC ACIDOPHILUS XTRA 40 MILLION LIVE CELLS PER SERVING VEGETARIAN FORMULA
16875	SUNDOWN NATURALS PROBIOTIC ACIDOPHILUS XTRA 40 MILLION LIVE CELLS PER SERVING VEGETARIAN FORMULA
13284	SUNDOWN NATURALS ULTIMATE PROBIOTIC FORMULA ACIDOPHILUS 2 BILLION ACTIVE CULTURES VEGETARIAN FORMULA 1 PER DAY
16876	SUNDOWN NATURALS ULTIMATE PROBIOTIC FORMULA ACIDOPHILUS 2 BILLION ACTIVE CULTURES VEGETARIAN FORMULA 1 PER DAY
17469	SUNIBIOTICS POTENT PROBIOTICS WITH ORGANIC PREBIOTICS POWDER SUPERFOOD PROBIOTIC 20 BILLION CELLS PER SERVING NEW FORMULA DAILY PROBIOTIC USDA ORGANIC
10587	SUSTENEX DAILY PROBIOTIC 2 BILLION CELLS OF GANEDENBC30
15946	SWANSON PROBIOTICS DR. STEPHEN LANGER'S ULTIMATE 16 STRAIN PROBIOTIC WITH TRACE MINERALS & FOS 3 BILLION CFU VEGETARIAN FORMULA
13369	SWANSON ULTRA PROBIOTIC COMPLEX
14631	THE HONEST CO. BABY & TODDLER MULTI POWDER COMPLETE MULTI-VITAMIN + MINERALS + SUPERFOODS + ANTIOXIDANTS + AMINO ACIDS + PROBIOTICS WHOLE-FOOD BASED 100% NATURAL PRE-MEASURED INDIVIDUAL PACKETS
7041	THE VITAMIN SHOPPE ACIDOPHILUS WITH PECTIN
8307	THE VITAMIN SHOPPE PSYLLIUM HUSK WITH ACIDOPHILUS
12246	THE VITAMIN SHOPPE ULTIMATE '10' PROBIOTIC 13 BILLION ORGANISMS WITH FRUCTO-OLIGOSACCHARIDES ENTERIC COATED
15963	THE VITAMIN SHOPPE ULTIMATE 10 PROBIOTIC TARGETED RELEASE 13 BILLION
17287	THERALAC BIO-REPLENISHING PROBIOTIC 5 COLONIZING STRAINS 2 PREBIOTICS 5+2 WITH LACTOSTIM 30 BILLION COLONIZING CFU/CAPSULE MASTER SUPPLEMENTS
12849	THERALAC PROBIOTIC MASTER 5 HUMAN STRAINS 2 PREBIOTICS 5 + 2 30 BILLION CFU PER CAPSULE WITH LACTOSTIM
14573	TOTAL PROBIOTICS NUTRI-WEST
17620	TOTAL PROBIOTICS NUTRI-WEST
10774	TRADER JOE'S ACIDOPHILUS & PROBIOTIC COMPLEX 2 BILLION ORGANISMS PER TABLET
12855	TRADER JOE'S ACTIVE 50+ ONCE DAILY MULTIVITAMIN & MINERAL PLUS PROBIOTICS 1000 IU VITAMIN D
14675	TRUBIOTICS DAILY PROBIOTIC FROM THE MAKERS OF ONE A DAY BAYER
14274	TRUNATURE DIGESTIVE PROBIOTIC 10 BILLION ACTIVE CULTURES
16345	TRUNATURE DIGESTIVE PROBIOTIC 10 BILLION ACTIVE CULTURES
2202	TWINLAB ALLERDOPHILUS ACIDOPHILUS CAPSULES HIGH POTENCY 182 MG
11685	ULTIMATE FLORA CRITICAL CARE 50 BILLION EXTRA-STRENGTH PROBIOTIC 10 PROBIOTIC STRAINS RENEW LIFE
16858	ULTIMATE FLORA CRITICAL CARE 50 BILLION LIVE CULTURES PER CAPSULE 10 PROBIOTIC STRAINS DELAYED RELEASE CAPSULES PROBIOTIC RENEW LIFE
13677	ULTIMATE FLORA EXTRA CARE DAILY PROBIOTIC 30 BILLION LIVE CULTURES PER CAPSULE 10 PROBIOTIC STRAINS ONE CAPSULE ONCE A DAY PROBIOTIC RENEW LIFE
13870	ULTIMATE FLORA KIDS PROBIOTIC 3 BILLION LIVE CULTURES PER TABLET PROBIOTIC RENEW LIFE
15932	ULTIMATE FLORA MEN'S COMPLETE 90 BILLION LIVE CULTURES PER CAPSULE 14 GPS PROBIOTIC STRAINS RENEW LIFE DELAYED RELEASE CAPSULES PROBIOTIC
16807	UP4 PROBIOTICS ADULT PROBIOTIC 15 BILLION CFU GUARANTEED DDS-1 TRADEMARKED SUPERSTRAIN
10570	VIBRANT HEALTH GREEN VIBRANCE 25 BILLION PROBIOTICS PER DOSE FROM 12 STRAINS ORGANIC GREENS & FREEZE DRIED GRASS JUICES
17018	VIBRANT HEALTH GREEN VIBRANCE JUNIOR FOR TODDLERS + TWEENS VERSION 4.0 9 BILLION PROBIOTICS PER DOSE FROM 9 STRAINS GREEN SUPERFOOD + PROTEIN + D3 SPECIFICALLY DESIGNED FOR A GROWING CHILD
17017	VIBRANT HEALTH GREEN VIBRANCE PLANT-BASED ADVANCED DAILY SUPERFOOD +25 BILLION PROBIOTICS CLINICALLY FORMULATED | VERSION 15.0
10035	VITAMIN WORLD ACIDOPHILUS & PSYLLIUM HUSK 4 BILLION ACTIVE CULTURES 4,000 MG PSYLLIUM HUSK PER SERVING
3885	VITAMIN WORLD CHEWABLE ACIDOPHILUS WITH BIFIDUS NATURAL STRAWBERRY FLAVOR
2629	WALGREENS ACIDOPHILUS 10 MG
6023	WALGREENS ACIDOPHILUS PLUS CITRUS PECTIN FREEZE DRIED
17397	WALGREENS CHILDREN'S PROBIOTIC CHEWABLE TABLETS WITH LACTOBACILLUS RHAMNOSUS GG 5 BILLION ACTIVE CULTURES PER TABLET
11347	WHOLE FOODS PREMIER FORMULA PROBIOTIC COMPLEX PLUS
12351	WINDMILL NATURAL ACIDOPHILUS PRO-BIOTIC BLEND WITH PECTIN
16464	YOUNG LIVING LIFE 5 HIGH-POTENCY PROBIOTIC 10 BILLION ACTIVE CULTURES
